# Supplementary material for: The chloroplast genome sequence of bittersweet (Solanum dulcamara): Plastid genome structure evolution in Solanaceae
Source: PubMed Central journal article supplement (PMC5919006; doi:10.1371/journal.pone.0196069), 2018-04-25

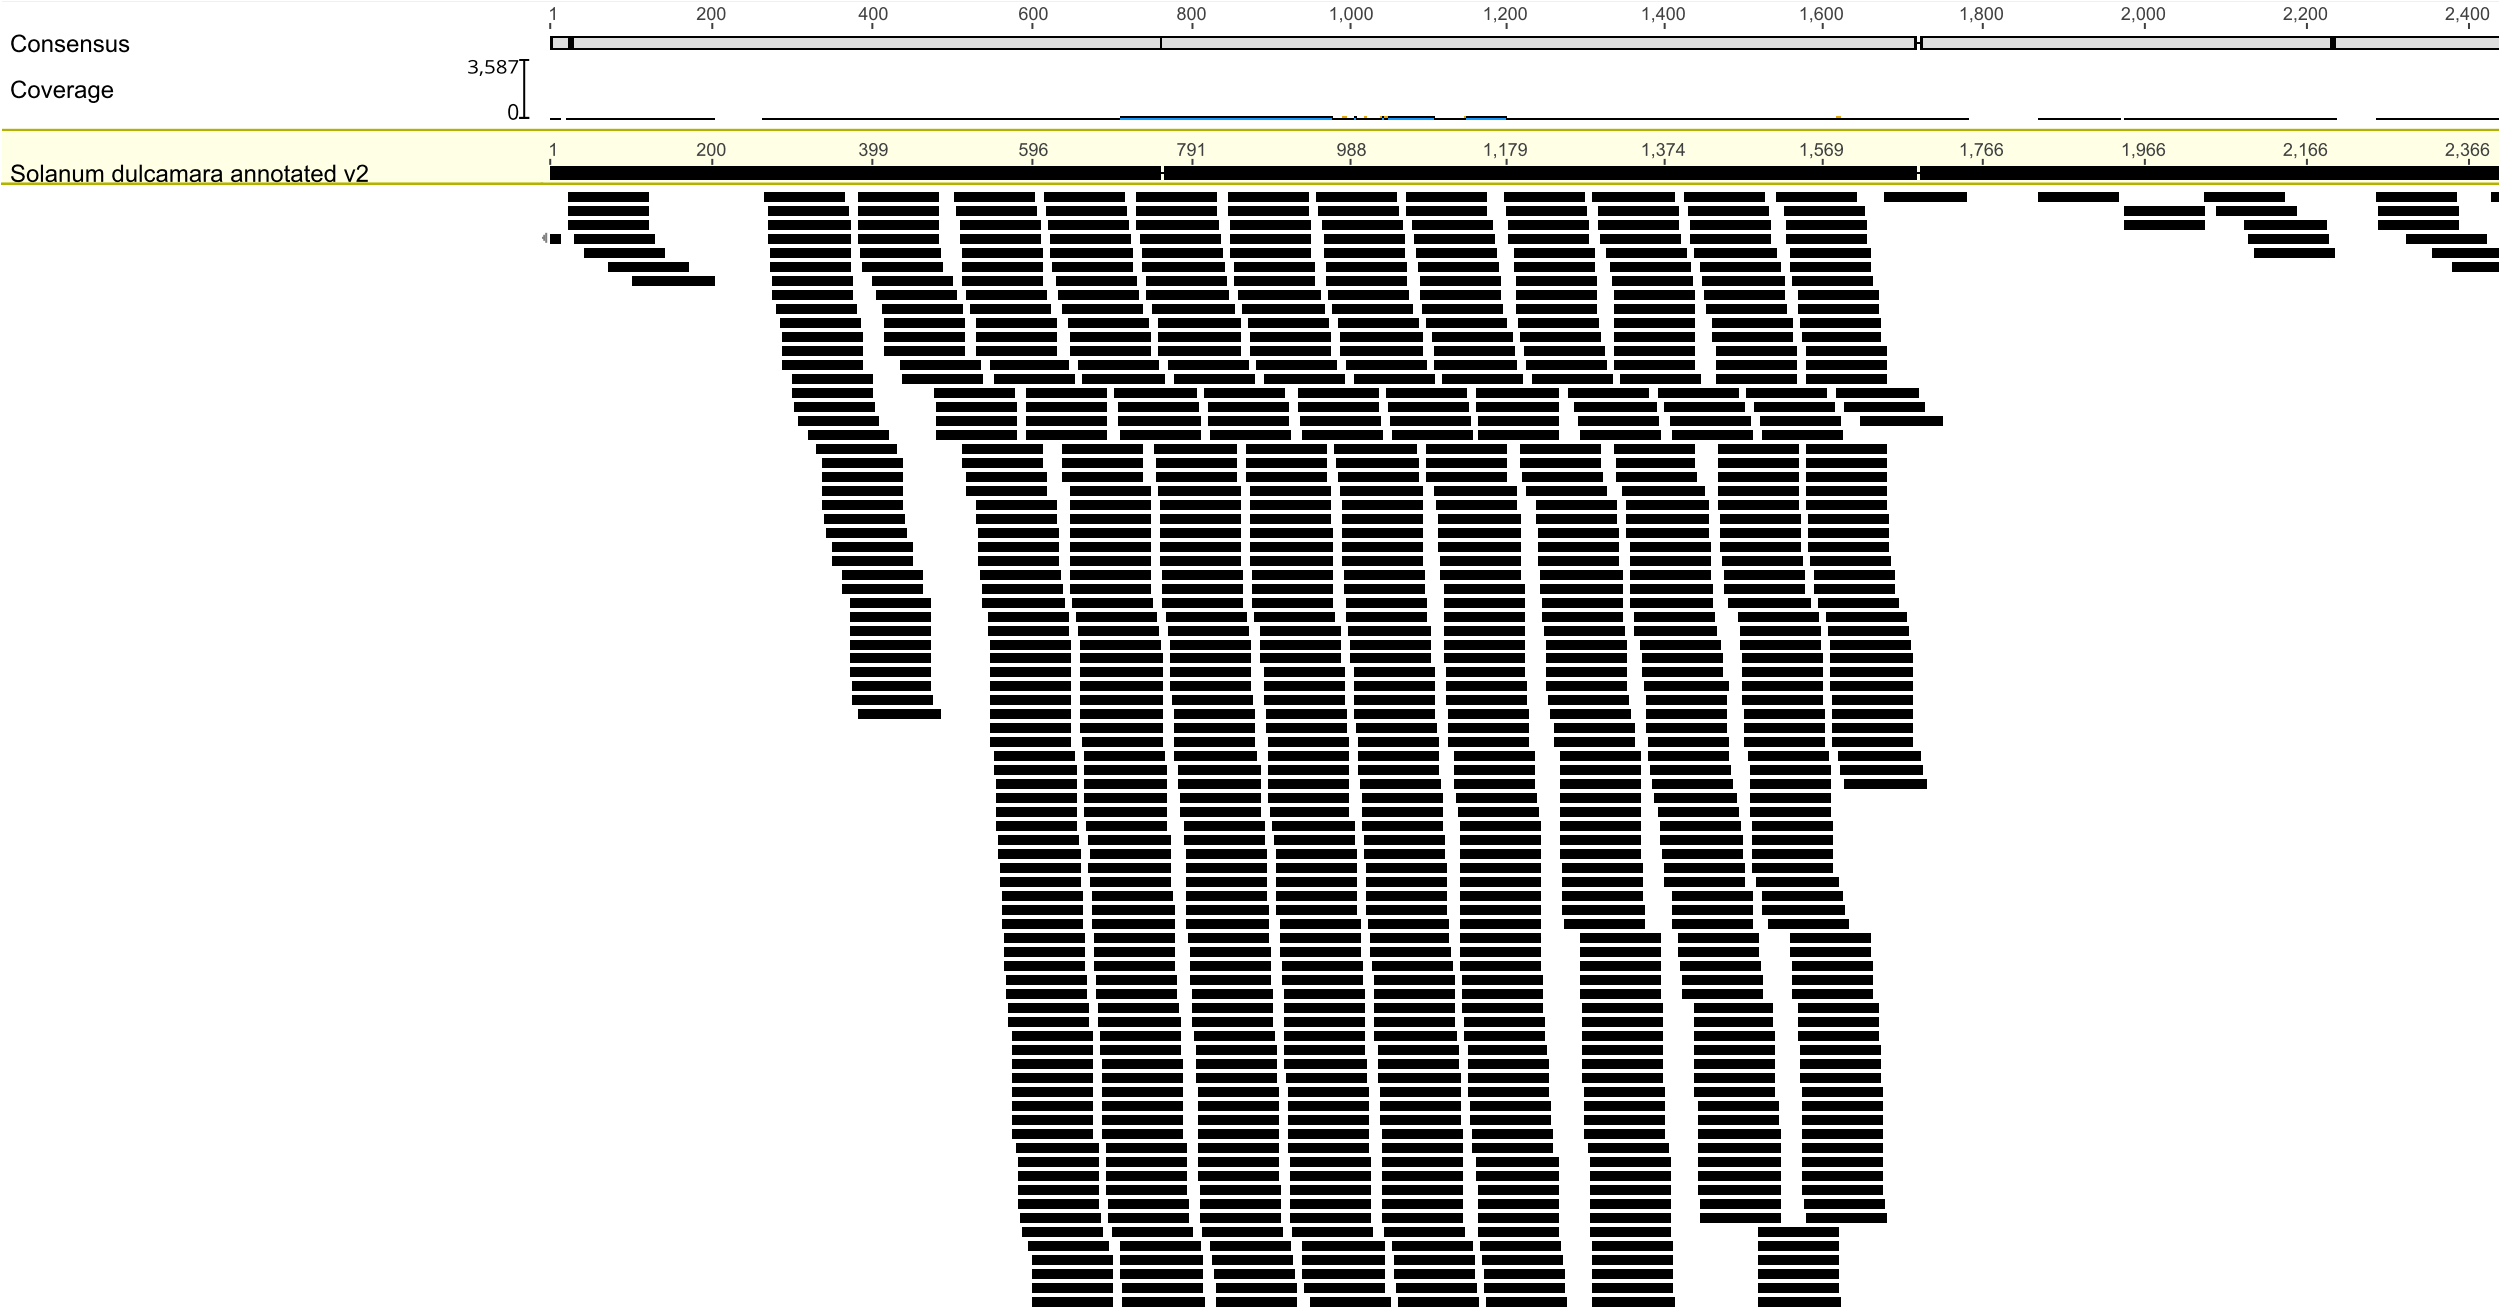

Supplement: pone.0196069.s017.pdf [file pone.0196069.s017.pdf]
